# Inheritance of an Epigenetic Mark: The CpG DNA Methyltransferase 1 Is Required for De Novo Establishment of a Complex Pattern of Non-CpG Methylation

Valérie Grandjean<sup>1,2,3\*</sup>, Ruken Yaman<sup>1,2,3</sup>, François Cuzin<sup>1,2,3</sup>, Minoo Rassoulzadegan<sup>1,2,3</sup>

1 Inserm, U636, Nice, France, 2 Laboratoire de Génétique du Développement Normal et Pathologique, Université de Nice-Sophia Antipolis, Nice, France, 3 Equipe Labellisée Ligue Nationale Contre le Cancer, Nice, France

Site-specific methylation of cytosines is a key epigenetic mark of vertebrate DNA. While a majority of the methylated residues are in the symmetrical (meC)pG:Gp(meC) configuration, a smaller, but significant fraction is found in the CpA, CpT and CpC asymmetric (non-CpG) dinucleotides. CpG methylation is reproducibly maintained by the activity of the DNA methyltransferase 1 (Dnmt1) on the newly replicated hemimethylated substrates (meC)pG:GpC. On the other hand, establishment and hereditary maintenance of non-CpG methylation patterns have not been analyzed in detail. We previously reported the occurrence of site- and allele-specific methylation at both CpG and non-CpG sites. Here we characterize a hereditary complex of non-CpG methylation, with the transgenerational maintenance of three distinct profiles in a constant ratio, associated with extensive CpG methylation. These observations raised the question of the signal leading to the maintenance of the pattern of asymmetric methylation. The complete non-CpG pattern was reinstated at each generation in spite of the fact that the majority of the sperm genomes contained either none or only one methylated non-CpG site. This observation led us to the hypothesis that the stable CpG patterns might act as blueprints for the maintenance of non-CpG DNA methylation. As predicted, non-CpG DNA methylation profiles were abrogated in a mutant lacking *Dnmt1*, the enzymes responsible for CpG methylation, but not in mutants defective for either *Dnmt3a* or *Dnmt2*.

Citation: Grandjean V, Yaman R, Cuzin F, Rassoulzadegan M (2007) Inheritance of an Epigenetic Mark: The CpG DNA Methyltransferase 1 Is Required for De Novo Establishment of a Complex Pattern of Non-CpG Methylation. PLoS ONE 2(11): e1136. doi:10.1371/journal.pone.0001136

## INTRODUCTION

One of the key mechanisms of epigenetic modification of vertebrate genomes is the methylation of cytosine residues in the DNA sequence. The resulting profiles are determinant in normal developmental processes as well as in several human disorders [1,2]. They are mitotically stable and were found in several instances inherited through the germ line [3,4]. Methylation in the symmetric dinucleotides CpG:GpC is an important determinant of chromatin structure, playing a role in gene silencing and in the control of imprinted genes. It is maintained by the activity of DNA methyltransferase *Dnmt1* on the hemimethylated meCpG:GpC structures created by replication forks [5,6]. Although less frequent, methylation in the asymmetric non-CpG sequences CpC, CpA and CpT has been repeatedly reported, first in plant [7] and more recently in mammalian genomes [8–10]. The enzymes required for non CpG DNA methylation in mammals have been analyzed in ES cells where, by contrast to somatic cells, a high percentage of non CpG DNA methylation has been found. Although the *Dnmt1* protein is not required for their presence, the *de novo* DNA methyltransferases *Dnmt3a* and/or *Dnmt3b* are thought to be mainly responsible for the CpA and CpT methylation [8,11]. However, while most of the studies performed on non CpG DNA methylation in mammals, accounts for the presence of this modification at specific sites of the genome, neither the maintenance of this type of epigenetic modification over large number of generations nor the signals leading to the inheritance of this epigenetic modification have been investigated in details.

Starting from our previous observation of defined CpG and non-CpG methylation patterns induced by Cre-LoxP interaction in meiotic cells [12], we investigated the mechanisms of inheritance of these epigenetic marks. We performed a systematic analysis of one of these patterns involving both CpG and non-CpG methylations in a mutant *Rvx* locus. Three distinct methylation profiles were

evidenced at each generation, in constant ratios in all somatic tissues, were found stable over more than 15 generations. Non-CpG DNA methylation was strictly allele-specific, never affecting the wild type locus in heterozygotes. One half of the DNA molecules in this complex, at each generation and in every organ including sperm, were exclusively methylated at CpG sites, thus raising the question of the nature of the epigenetic signal transmitted with the unique copy of the sperm genome to regenerate in the next generation the constant ratio of three distinct profiles.

## RESULTS

### Hereditary maintenance of a complex pattern of non-CpG methylation

We previously reported [12] that interaction of the Cre recombinase with a *LoxP* element in meiotic cells leads to the establishment of defined patterns of DNA methylation, extending

.....  
**Academic Editor:** Sebastian Fugmann, National Institute on Aging, United States of America

**Received** September 26, 2007; **Accepted** October 17, 2007; **Published** November 7, 2007

**Copyright:** © 2007 Grandjean et al. This is an open-access article distributed under the terms of the Creative Commons Attribution License, which permits unrestricted use, distribution, and reproduction in any medium, provided the original author and source are credited.

**Funding:** This work was supported by a grant from the Ligue Nationale Française Contre le Cancer to Minoo Rassoulzadegan.

**Competing Interests:** The authors have declared that no competing interests exist.

\* To whom correspondence should be addressed. E-mail: grandjea@unice.fr

into the neighboring sequences and involving both CpG and non-CpG sequences. To further investigate their mode of inheritance, mouse families were independently derived from parents in which such a methylated complex had been initiated at a *LoxP* element in intron 3 of the *AF1* mutant of the *Rxr $\alpha$*  gene. Families were separately bred for a total of about 15 generations, and DNA samples kept for analysis. A retrospective determination of the methylation status in each family at successive generations could thus be undertaken.

Bisulfite analysis of a 228 bp region including the *LoxP* element evidenced a complex pattern of non-CpG methylation (Fig. 1). Three classes of methylated molecules were identified, in constant ratios in somatic organs (tail, kidney, liver) and testes at the successive generations and in distinct families. In addition to a constant pattern of CpG methylation, half of the amplified molecules were free of non-CpG methylation, one third showed one methylated CpT, and 15 per cent contained three to five

methylated non-CpG cytosines, always at the same positions in the sequence (Fig 1). The modified locus was transmitted with equal high efficiencies by the male and the female parents. Families were bred in the B6D2 F1 hybrid genetic background, but the results were not dependent on this genetic set up, as the same observations were made after crosses with either C57BL/6 or 129/SV mice (Figure 1B).

The possibility of incomplete denaturation and cytosine conversion during bisulfite exposure was excluded for three independent reasons. First, artificial protection of a cytosine residue never occurs at constant sequence positions and never follows defined patterns. Secondly, non-CpG DNA methylation was specific to the mutant allele since we never evidenced such methylation in the allelic region of the wild type allele in heterozygotes (Fig 1). Finally, as a control, bisulfite sequencing analysis performed on *in vitro* methylated DNA never showed the same reproducible DNA methylation profile (data not shown).

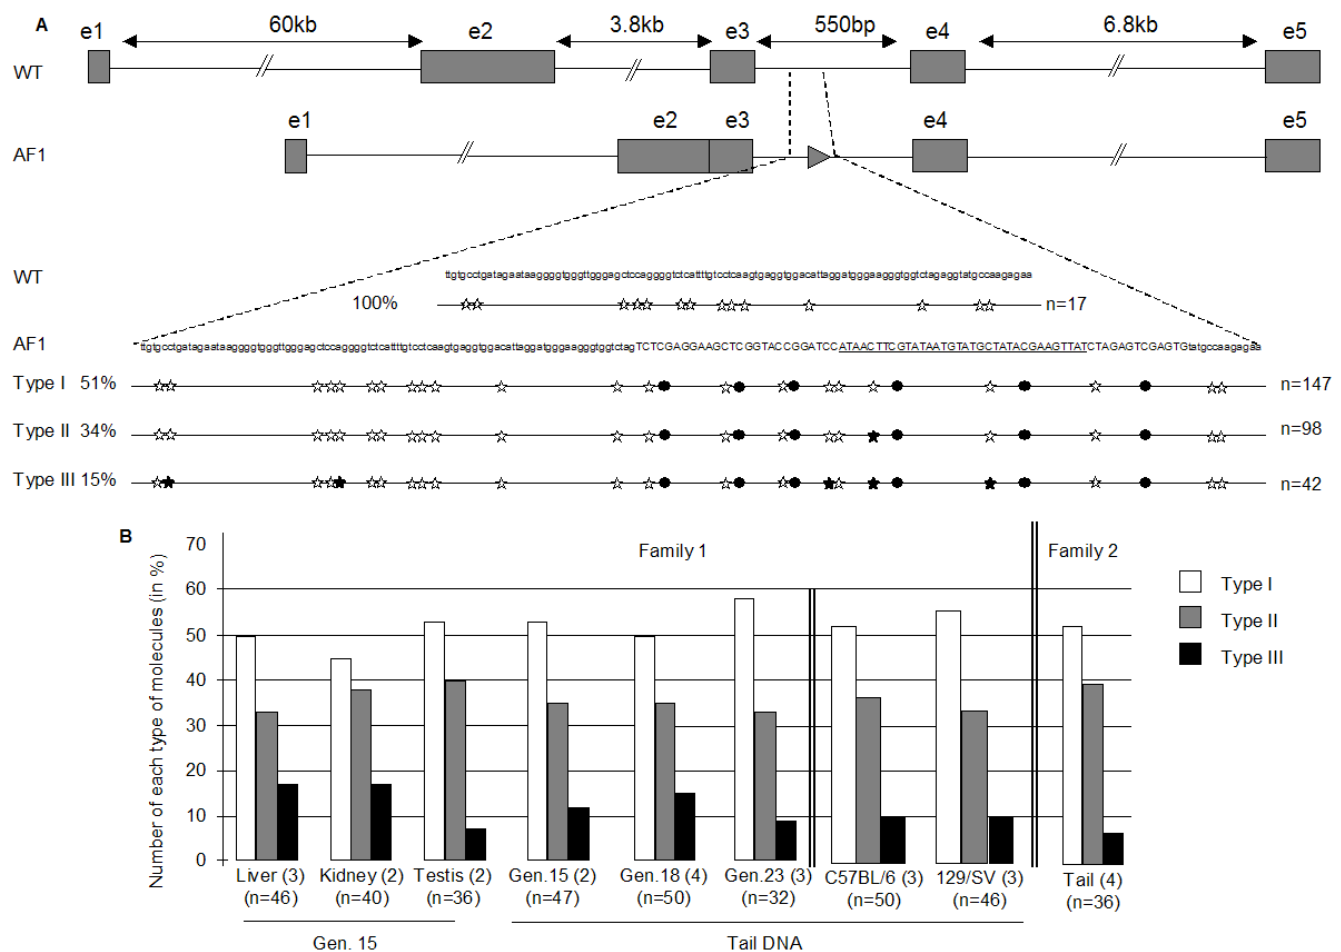

**Figure 1. Allele-specific maintenance of a complex methylation pattern.** A. Upper part: schematic representation of the *AF1* mutant and wild type *Rxr $\alpha$*  alleles. Boxes indicate exons. The nucleotide sequence surrounding the *LoxP* site in *AF1* (arrow head) and the methylation state of the cytosine residues are shown below. Open stars correspond to unmethylated cytosines, filled stars to methylated non-CpG and filled circles to methylated CpG sites. The three classes of methylated molecules are shown and their frequency (per cent) in a total of 287 clones sequenced after amplification. B. Distribution of the three classes of methylated molecules amplified from the *AF1* allele. Mice indicated as "Family 1" were derived from the same unmethylated *Rxr $\alpha$* <sup>AF1</sup> male carrying the *Sycp1-Cre* transgene and that indicated "Family 2", from a distinct ancestor. Genomic DNA from organs (liver, kidney and testis) dissected from 2 to 3 independent mice and genomic tail DNA from 2 to 4 different mice of each generation were subjected independently to bisulfite treatment. Each genomic DNA was then PCR amplified separately and classified in three different classes of methylated molecules. Number of mice used in each experiment are indicated in parentheses. From left to right: Family 1 liver, kidney, testis and tail DNA after 15 generations, tail DNA after 18 and 23 generations in the B6D2 F1 genetic background; tail DNA after 8 generations of crosses into the indicated backgrounds; Family 2 tail DNA after 15 generations in B6D2 F1. n correspond to the numbers of molecules analysed. doi:10.1371/journal.pone.0001136.g001

## Transgenerational signalling of the non CpG methylation pattern

The constant frequencies of the three methylation patterns of the mutant allele were stably maintained through successive generations. We considered several mechanisms that would account for the paternal transmission of the whole complex, mediated by a single copy of the haploid genome in the compacted sperm chromatin.

One possible scheme could be that the male haploid genome would carry the complete set of non-CpG methylations, part of which would be subsequently lost during somatic development. This hypothesis was disproved by bisulfite analysis of the methylation state in sperm DNA, showing a pattern in purified epididymal sperm identical to that of somatic DNA, with the same proportion of the three methylation profiles (Fig 2A). The majority of the haploid nuclei thus contains either no asymmetric methylated cytosines or only one in this interval, and still the complete picture is regenerated *de novo* at the following generation.

We then considered the somewhat less likely hypothesis that the signal leading to asymmetric methylation could be linked to the covalent modification of histones established during spermatogenesis. Inheritance via the male gamete would seem to exclude such a possibility, since histones are replaced by protamines in a generalized highly compact state of the sperm chromatin. Since, however, a minor fraction of the genome was reported to remain in the form of nucleohistones, we checked whether this might be the case of the *Rxrα* locus by fractionating histone and protamine associated DNA according to the published procedures [13,14]. PCR analysis of the fractions showed that the *Rxrα* locus is in fact included in the nucleoprotamine fraction (Fig 2B), thus excluding histone modification as a transgenerational determinant of the modified chromatin structure.

The remaining possibility was to consider the CpG methylation pattern in the sperm genome as the determinant of non-CpG methylation. This hypothesis was strengthened by the genetic analysis of the methyltransferases involved.

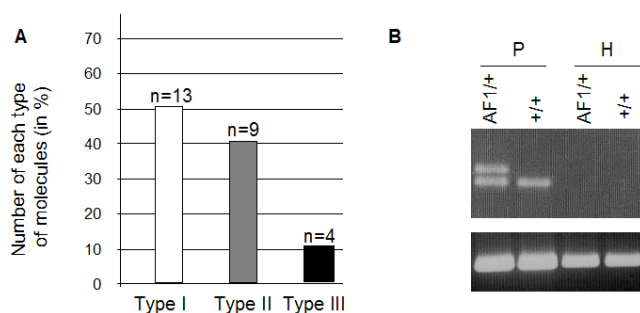

**Figure 2. Epigenetic marks in sperm nuclei.** A. Distribution in sperm DNA of the methylation profiles shown in Fig. 1. Numbers of molecules of each profile are indicated and correspond to the analysis of two independent PCR reactions where two different preparations of sperm bisulfite-treated DNA were used as template. B. The *Rxrα* locus is included in the protamine-associated fraction of the sperm chromatin. Wild type (+/+) and heterozygote (*AF1*/+) sperm chromatin preparations were partitioned into histone-enriched (H) or protamine-enriched (P) DNA fractions after *EcoRI* and *BamHI* restriction cleavage. PCR analysis of the methylated *LoxP* region and of *Line 1* elements, known to be present in the nucleosomal fraction [18], was performed on the fractions using the primers and conditions indicated in Table 1. doi:10.1371/journal.pone.0001136.g002

## Dnmt1 activity is required to maintain the non-CpG methylation pattern

Assays of the substrate specificity of the murine DNA methyltransferases in transgenic *Drosophila*, evidenced low levels of non-CpG methylation in flies expressing either Dnmt3a or Dnmt2 [15]. The former was considered as a *de novo* DNA methyltransferase and a likely candidate for asymmetric methylation [8]. Dnmt2 protein has been recently shown to catalyze methylation of tRNA<sup>Asp</sup> [16], but it also exhibits a limited activity of non-CpG methylation on DNA substrates.

To determine whether one of these enzymes is responsible for the maintenance of the established pattern of asymmetric methylation in *LoxP* recombined regions, we analyzed the DNA methylation status at the mutant *Rxrα* locus in mice homozygous for either a *Dnmt3a* null allele or a *Dnmt2* allele. For that purpose, *Dnmt3a*<sup>+/-</sup> or *Dnmt2*<sup>+/-</sup> heterozygotes were crossed with mice showing asymmetric methylation. Double heterozygotes were then crossed to generate the *Dnmt3a*<sup>-/-</sup> or *Dnmt2*<sup>-/-</sup> homozygotes. Bisulfite analysis (Table 2) showed that the same patterns of asymmetric methylation had been maintained at the *LoxP* allele in the *Dnmt3a* and *Dnmt2* null mutant.

In a rather unexpected manner, the only null mutation among the methyltransferases tested that proved effective in disturbing the methylation profile of the locus was a deletion of the Dnmt1 locus. Among the four mammalian DNA methyltransferases, Dnmt1 has been considered as the main enzyme responsible for the maintenance of CpG methylation [5]. To determine whether this enzyme might be involved in the maintenance of non-CpG methylation profiles, we analyzed the status of this region in mice homozygous for a *Dnmt1* null mutation. The necessary crosses were performed to generate the methylated *Rxrα*<sup>AF1</sup>, *Dnmt1*<sup>-/-</sup> genotype. As the mutants lacking the enzyme die at mid gestation, analysis of the *Rxrα*<sup>AF1</sup>, *Dnmt1*<sup>-/-</sup> was performed on DNA extracted from embryos at 8.5 *dpc*, a developmental time at which DNA methylation patterns are well established in *Dnmt1*<sup>+/-</sup> heterozygotes as in the wild type (Fig 3). If, as expected, CpG methylation was disturbed in *Dnmt1*<sup>-</sup> homozygotes, although not completely suppressed, it was unexpectedly observed that the non-CpG profiles were abolished. The majority of the amplified molecules were either not at all or only partially methylated. Importantly, even in the latter class, none of the profiles followed the reproducible pattern of *Dnmt1*<sup>+</sup> animals.

Altogether these results suggest that asymmetric DNA methylation depends on the prior establishment of a CpG methylation profile and on its maintenance by the Dnmt1 methyltransferase.

## DISCUSSION

DNA methylation is clearly a key feature in the establishment of local chromatin structures and epigenetic controls [1]. Still, the mechanisms leading to the establishment and maintenance of methylation patterns are largely unknown. Most of the currently available information concerns methylation in the symmetrical CpG dinucleotides. Much less is known of the somatic and germ line maintenance of the non CpG methylation pattern observed in animal and plant cells. We previously described experimental conditions under which both CpG and non-CpG methylations are established *de novo* in the mouse. Dependent on an initial heterologous recombination event (Cre-LoxP) in a meiotic cell, they are subsequently maintained in the absence of the recombinase. Our original observations included two loci of the mouse genome, namely the *Rxrα* and ROSA26 genes [12], and further studies were concentrated on the well-defined *Rxrα* site. As the initiation event was repeatedly reproduced from naive unmethylated mice, and families subsequently established and propagated, we were in a position to ascertain their somatic stability and heritability.



**Table 2.** Heritable methylation profiles require the Dnmt1 but neither the Dnmt2 nor the Dnmt3a methyltransferase.

| Methylation profile* | Mouse genotypes and DNA analysed |                     |                                       |                                      |                                        |                                        |
|----------------------|----------------------------------|---------------------|---------------------------------------|--------------------------------------|----------------------------------------|----------------------------------------|
|                      | Wild type tail DNA               | Wild type sperm DNA | <i>Dnmt3a</i> <sup>-/-</sup> tail DNA | <i>Dnmt2</i> <sup>-/-</sup> tail DNA | <i>Dnmt1</i> <sup>+/-</sup> embryo DNA | <i>Dnmt1</i> <sup>-/-</sup> embryo DNA |
|                      | (n = 287)                        | (n = 26)            | (n = 23)                              | (n = 46)                             | (n = 20)                               | (n = 46)                               |
|                      | (x = 10)                         | (x = 3)             | (x = 3)                               | (x = 3)                              | (x = 4)                                | (x = 3)                                |
| Type I               | 51±3                             | 55±5                | 48±10                                 | 55±8                                 | 60±5                                   | 0                                      |
| Type II              | 34±2                             | 34±2                | 39±1                                  | 36±5                                 | 30±6                                   | 0                                      |
| Type III             | 15±3                             | 12±7                | 13±10                                 | 9±0.4                                | 10±3                                   | 0                                      |
| Other                | 0                                | 0                   | 0                                     | 0                                    | 0                                      | 100 <sup>§</sup>                       |

\*CpG/non-CpG methylation profiles as shown in Fig. 1.

n and x correspond to the number of clones sequenced and the number of mice analyzed, respectively.

<sup>§</sup>see Fig. 3.

doi:10.1371/journal.pone.0001136.t002

progenies), C57BL/6 (*Rxrx<sup>AF1</sup>*) and 129/Sv (*Dnmt<sup>+/-</sup>* lines). Genotyping was performed by PCR analysis, with the primer sequences and amplification conditions listed in Table 1.

### Sodium bisulfite sequencing

One microgram of genomic DNA extracted from either liver, testis, kidney or tail from independent mice were restriction digested with *Bgl*III and subjected to sodium bisulfite treatment as described [24]. PCR amplification from each bisulfite-treated genomic DNA was always carried out independently using primers previously described [12]. PCR products were subcloned into the pGEM®-T Easy vector (Promega) and cycle sequenced. We sequenced 5 to 20 clones from each genomic DNA samples and performed independent sets of DNA modification, amplification, cloning, and sequencing. The sequenced obtained were classified into three categories on the basis of the methylated non-CpG

content and the numbers presented in the figures correspond to the cumulative numbers obtained from each experiment.

### Fractionation of sperm chromatin

Sperm DNA was fractionated into histone-associated and protamine-associated DNA as described [13].

### ACKNOWLEDGMENTS

We thank T. Bestor, E. Li and P. Chambon for providing, respectively, the *Dnmt1*<sup>+/-</sup>, *Dnmt2*<sup>+/-</sup>, *Dnmt3a*<sup>+/-</sup> and *Rxrx<sup>AF1</sup>* mice. We are indebted to Yan Fantei-Caujolle for expert technical assistance.

### Author Contributions

Conceived and designed the experiments: MR VG FC. Performed the experiments: VG RY. Analyzed the data: MR VG FC. Wrote the paper: MR VG FC.

### REFERENCES

- Bird A (2002) DNA methylation patterns and epigenetic memory. *Genes Dev* 16: 6–21.
- Robertson KD (2005) DNA methylation and human disease. *Nat Rev Genet* 6: 597–610.
- Gicquel C, Rossignol S, Cabrol S, Houang M, Steunou V, et al. (2005) Epimutation of the telomeric imprinting center region on chromosome 11p15 in Silver-Russell syndrome. *Nat Genet* 37: 1003–1007.
- Suter CM, Martin DI, Ward RL (2004) Germline epimutation of MLH1 in individuals with multiple cancers. *Nat Genet* 36: 497–501.
- Hermann A, Goyal R, Jeltsch A (2004) The Dnmt1 DNA-(cytosine-C5)-methyltransferase methylates DNA processively with high preference for hemimethylated target sites. *J Biol Chem* 279: 48350–48359.
- Li E, Beard C, Forster AC, Bestor TH, Jaenisch R (1993) DNA methylation, genomic imprinting, and mammalian development. *Cold Spring Harb Symp Quant Biol* 58: 297–305.
- Meyer P, Niedenhof I, ten Lohuis M (1994) Evidence for cytosine methylation of non-symmetrical sequences in transgenic *Petunia hybrida*. *Embo J* 13: 2084–2088.
- Ramsahoye BH, Binizkiewicz D, Lyko F, Clark V, Bird AP, et al. (2000) Non-CpG methylation is prevalent in embryonic stem cells and may be mediated by DNA methyltransferase 3a. *Proc Natl Acad Sci U S A* 97: 5237–5242.
- White GP, Watt PM, Holt BJ, Holt PG (2002) Differential patterns of methylation of the IFN-gamma promoter at CpG and non-CpG sites underlie differences in IFN-gamma gene expression between human neonatal and adult CD45RO<sup>+</sup> T cells. *J Immunol* 168: 2820–2827.
- Kouidou S, Malousi A, Maglaveras N (2006) Methylation and repeats in silent and nonsense mutations of p53. *Mutat Res* 599(1–2), 167–77.
- Dodge JE, Ramsahoye BH, Wo ZG, Okano M, Li E (2002) De novo methylation of MMLV provirus in embryonic stem cells: CpG versus non-CpG methylation. *Gene* 289: 41–48.
- Rassoulzadegan M, Magliano M, Cuzin F (2002) Transvection effects involving DNA methylation during meiosis in the mouse. *EMBO J* 21: 440–450.
- Gardiner-Garden M, Ballesteros M, Gordon M, Tam PP (1998) Histone- and protamine-DNA association: conservation of different patterns within the beta-globin domain in human sperm. *Mol Cell Biol* 18: 3350–3356.
- Pittoggi C, Renzi L, Zaccagnini G, Cimmini D, Degrossi F, et al. (1999) A fraction of mouse sperm chromatin is organized in nucleosomal hypersensitive domains enriched in retroposon DNA. *J Cell Sci* 112: 3537–3548.
- Mund C, Musch T, Stroedicke M, Assmann B, Li E, et al. (2004) Comparative analysis of DNA methylation patterns in transgenic *Drosophila* overexpressing mouse DNA methyltransferases. *Biochem J* 378: 763–768.
- Goll MG, Kirpekar F, Maggert KA, Yoder JA, Hsieh CL, et al. (2006) Methylation of tRNA<sup>Asp</sup> by the DNA methyltransferase homolog Dnmt2. *Science* 311: 395–398.
- Imamura T, Kerjean A, Heams T, Kupiec JJ, Thenevin C, et al. (2005) Dynamic CpG and non-CpG methylation of the *Peg1/Mest* gene in the mouse oocyte and preimplantation embryo. *J Biol Chem* 280: 20171–20175.
- Bird AP, Wolffe AP (1999) Methylation-induced repression—belts, braces, and chromatin. *Cell* 99: 451–454.
- Cherry SR, Baltimore D (1999) Chromatin remodeling directly activates V(D)J recombination. *Proc Natl Acad Sci U S A* 96: 10788–10793.
- Pelissier T, Wassenegger M (2000) A DNA target of 30 bp is sufficient for RNA-directed DNA methylation. *Rna* 6: 55–65.
- Rassoulzadegan M, Grandjean V, Gounon P, Vincent S, Gillot I, et al. (2006) RNA-mediated non-Mendelian inheritance of an epigenetic change in the mouse. *Nature* 431: 469–474.
- Li E, Bestor TH, Jaenisch R (1992) Targeted mutation of the DNA methyltransferase gene results in embryonic lethality. *Cell* 69: 915–926.
- Okano M, Bell DW, Haber DA, Li E (1999) DNA methyltransferases Dnmt3a and Dnmt3b are essential for de novo methylation and mammalian development. *Cell* 99: 247–257.
- Olek A, Oswald J, Walter J (1996) A modified and improved method for bisulphite based cytosine methylation analysis. *Nucleic Acids Res* 24: 5064–5066.
